# Promoting Household Water Treatment through Women's Self Help Groups in Rural India: Assessing Impact on Drinking Water Quality and Equity

Matthew C. Freeman<sup>1,2\*</sup>, Victoria Trinies<sup>3</sup>, Sophie Boisson<sup>2</sup>, Gregory Mak<sup>3</sup>, Thomas Clasen<sup>2</sup>

<sup>1</sup> Department of Environmental Health, Center for Global Safe Water, Rollins School of Public Health, Emory University, Atlanta, Georgia, United States of America,

<sup>2</sup> Faculty of Infectious Disease, Environmental Health Group, London School of Hygiene and Tropical Medicine, London, United Kingdom, <sup>3</sup> Department of Environmental Health, Mailman School of Public Health, Columbia University, New York, New York, United States of America

## Abstract

Household water treatment, including boiling, chlorination and filtration, has been shown effective in improving drinking water quality and preventing diarrheal disease among vulnerable populations. We used a case-control study design to evaluate the extent to which the commercial promotion of household water filters through microfinance institutions to women's self-help group (SHG) members improved access to safe drinking water. This pilot program achieved a 9.8% adoption rate among women targeted for adoption. Data from surveys and assays of fecal contamination (thermotolerant coliforms, TTC) of drinking water samples (source and household) were analyzed from 281 filter adopters and 247 non-adopters exposed to the program; 251 non-SHG members were also surveyed. While adopters were more likely than non-adopters to have children under 5 years, they were also more educated, less poor, more likely to have access to improved water supplies, and more likely to have previously used a water filter. Adopters had lower levels of fecal contamination of household drinking water than non-adopters, even among those non-adopters who treated their water by boiling or using traditional ceramic filters. Nevertheless, one-third of water samples from adopter households exceeded 100 TTC/100ml (high risk), and more than a quarter of the filters had no stored treated water available when visited by an investigator, raising concerns about correct, consistent use. In addition, the poorest adopters were less likely to see improvements in their water quality. Comparisons of SHG and non-SHG members suggest similar demographic characteristics, indicating SHG members are an appropriate target group for this promotion campaign. However, in order to increase the potential for health gains, future programs will need to increase uptake, particularly among the poorest households who are most susceptible to disease morbidity and mortality, and focus on strategies to improve the correct, consistent and sustained use of these water treatment products.

**Citation:** Freeman MC, Trinies V, Boisson S, Mak G, Clasen T (2012) Promoting Household Water Treatment through Women's Self Help Groups in Rural India: Assessing Impact on Drinking Water Quality and Equity. PLoS ONE 7(9): e44068. doi:10.1371/journal.pone.0044068

**Editor:** A. Mark Ibekwe, U. S. Salinity Lab, United States of America

**Received:** February 13, 2012; **Accepted:** July 30, 2012; **Published:** September 5, 2012

**Copyright:** © 2012 Freeman et al. This is an open-access article distributed under the terms of the Creative Commons Attribution License, which permits unrestricted use, distribution, and reproduction in any medium, provided the original author and source are credited.

**Funding:** This study was funded by Hindustan Level Limited, the maker of the Pureit water filter. The funders had no role in study design, data collection and analysis, decision to publish, or preparation of the manuscript.

**Competing Interests:** The authors have read the journal's policy and have the following conflicts related to the funding of the study. This study was funded by Hindustan Level Limited, the maker of the Pureit water filter. This does not alter the authors' adherence to all the PLoS ONE policies on sharing data and materials.

\* E-mail: mcfreem@emory.edu

## Introduction

Unsafe drinking water is a leading cause of preventable disease, particularly among the young, the immuno-compromised and the poor [1]. Diarrhea represents a significant share of this burden, causing an estimated 4 billion cases and 1.9 million deaths each year of children under 5 years, or 19% of all such deaths in developing countries [2]. Because they lack safe water and sanitation, low-income populations bear much of this disease burden [3]. Lower levels of education by caregivers and distance to improved water supplies are also risk factors for diarrhea in children. With over 386,000 deaths attributable to diarrheal diseases per year, India ranks first among countries contributing to this worldwide disease burden [4].

India has made considerable progress in recent years in improving water supplies in both rural and urban settings [5]. However, only 12% of the rural population is served by a household connection [6]. Moreover, surveys of microbial water

quality throughout India have shown extensive fecal contamination of drinking water supplies. In Hyderabad, for example, 50% of water samples drawn from pre-monsoon, monsoon, and post-monsoon period were positive for fecal coliforms [7]. In Madhya Pradesh, 33% of boreholes were fecally contaminated [8]. Even water that is safe at the point of distribution is subject to frequent and substantial contamination during collection, transport, and storage [9].

Household water treatment and safe storage (HWTS), including boiling, chlorinating, and filtering water at home, offers the potential for addressing both uncertain water quality at the point of delivery and post-collection contamination. Systematic reviews of water quality interventions have shown HWTS – including filtration and chlorination – can be effective in improving the quality of drinking water and in preventing diarrhea [10–12]. Studies have also shown more traditional HWTS practices – such as boiling – can also be microbiologically effective [13,14]. Based on this evidence, the World Health Organization (WHO) and

UNICEF recommend HWTs for populations relying on unsafe water supplies as part of a comprehensive strategy to prevent diarrheal disease, particularly among young children [4].

Nevertheless, the potential of HWTs has not been realized at scale, largely because of the challenge of reaching the most vulnerable populations with effective HWTs options that are accessible, acceptable and affordable and that they will use correctly and consistently on a sustainable basis [15]. While boiling is the most common method of treating water at home worldwide and has been shown to be effective in India [13], only about 10% of the Indian population reports boiling their water before drinking it [16]. Chlorinating water with sodium hypochlorite, an intervention that has achieved scale elsewhere, has not been successfully promoted in India. Gravity water filters, including traditional ceramic “candle” filters and, more recently, a variety of commercial filters that incorporate disinfection media, are one HWTs option that has achieved scale nationally. However, the up-front cost of microbiological quality filters has generally made them prohibitively expensive for low-income populations who are at greatest risk [15].

Promotion through microfinance institutions (MFIs) may offer a way to overcome the barriers of access to and affordability of HWTs. A study of a school-based promotion approach in India revealed the potential for micro loans offered by women’s self-help groups (SHGs) to provide needed financing to reach the poorest households [17]. SHGs have also been shown to provide a critical social network that may lead to increased uptake among marginalized populations [18,19]. In 2007, Hindustan Unilever Limited (HUL) and ACCESS Development Services (ACCESS), a support organization for an alliance of microfinance institutions, began a pilot program to explore the potential for using microfinance institutions to improve awareness of and access to a commercial HWTs product among lower-income rural populations in India. Through the program, SHG members were offered the opportunity to purchase HUL’s Pureit® filter and micro loans to mitigate the up-front cost. Researchers undertook this study to evaluate the extent to which the pilot program improved drinking water quality among the target population, a condition to achieving health gains. If proven effective, this mechanism seems plausible for scale-up for this and other HWTs solutions given high MFI penetration and participation throughout India.

## Methods

### Ethical considerations

The study was reviewed and approved by the Ethics Committee of the London School of Hygiene and Tropical Medicine and the Institutional Review Board (IRB) of Columbia University Mailman School of Public Health. The study was exempt from ethics approval in India because it falls under the provisions of program evaluation [20]. An information sheet providing complete details of the study, advising that participation was entirely voluntary, and assuring participants of the confidentiality of their personal data was read to all participants and written consent was recorded. Respondents did not receive compensation for their participation.

### Program background

HUL, a subsidiary of Unilever Ltd., is one of the largest consumer products companies in India. ACCESS, originally organized by CARE, an international non-governmental organization (NGO), provides organizational and technical assistance to an alliance of over 110 non-profit microfinance institutions (MFIs) in the Indian states of Andhra Pradesh and Tamil Nadu that each

support a network of women’s self-help groups (SHGs). The objective of the pilot program was to improve the drinking water quality of lower-income households who were not reached through normal commercial channels by increasing their awareness of effective HWTs methods – including boiling, filtration, and chlorine additives – and extending access to HUL’s Pureit filter as well as micro loans to purchase a filter.

The Pureit filter removes microbial contaminants through chlorination and carbon filtration; treated water is safely stored in a residual chamber where it is accessed via a tap [21]. The unit retailed for 1,500 Indian Rupees (RS) (US\$32) at the start of the pilot program and sold for Rs 2,000 (US\$43) at the time of the study. Pureit provides continuous filtration for 1,500 L of drinking water, at which point the unit’s end of life meter indicates the need to replace the consumable “battery” (prefilter, chlorine cartridge and carbon media) at a cost of Rs 350 (US\$7).

Under the pilot program, HUL representatives gave presentations to SHG members about the sources and risks of contaminated drinking water and methods to effectively treat their water at home, including boiling, filtration, and chlorination, and gave a demonstration of the Pureit filter. After the presentation, SHG members were informed that they could take out a micro loan to purchase the Pureit filter. Repayment terms varied but adopters typically made a down payment and paid the remainder in installments over 8–18 months with 1–2% interest per month. HUL supplied the MFI a commission of 10% off the retail cost. After receiving orders, HUL technicians delivered and set up the filters at the purchaser’s house. As of June 2009, eleven ACCESS MFI affiliates covering 262,353 members had agreed to participate in the program. Of these, 67,230 members (25.6%) had received the presentations and 6,556 Pureit filters had been sold (representing 9.8% of households exposed to the program).

### Study design

The study was conducted between September and October 2009 in Andhra Pradesh. The evaluation was conducted as a case-control study following a design developed in part by Khan [22]. A case was defined as a female SHG member whose household had acquired a Pureit; a control was defined as a female member of an SHG that offered loans for Pureit but who had not purchased the product. Community respondents were also interviewed to provide comparison on several metrics. Resources allowed for an expected sample size of 300 cases and 300 controls. Sampling was done through a clustered approach due to logistic considerations such as the lack of centralized records. Villages served as the primary sampling unit and adopters/non-adopters as the secondary sampling unit.

### Sampling strategy

At the time of the study, eight MFIs in Andhra Pradesh had partnered with ACCESS and HUL to offer their members loans for Pureit. For logistical reasons, four were included in the study: PSS in Warangal, CAMP in Guntur, CAMEL in Sullurupet and IWB in Nellore. The number of villages and respondents under each MFI were selected proportionally to the number exposed to the program. Villages were randomly selected until we could identify a sufficient number of adopters. Selected villages were in rural and peri-urban areas. Due to the need for daily testing of water samples, villages more than 1.5 hours from the central water testing facility were not eligible for inclusion. Villages were also excluded when there were insufficient records to gather a list of SHG members and where there was no field staff at either HUL or the MFI available to help the survey team locate respondents. Following these eligibility criteria, a total of 33 villages were

surveyed. Respondents were selected from MFI records using systematic random sampling. For the purposes of this paper, we define purchasers of Pureit as “adopters,” and adopters who met criteria for use (treated current drinking water with Pureit) as “users.” Approximately eight systematically selected community members were interviewed in each village in order to assess equity of SHG membership and whether the controls were representative of the broader community.

### Household surveys and water sampling methods

Surveys were conducted in Telugu by a contracted team of five professional surveyors. The female head of household was asked about water handling and treatment practices, Pureit purchase and use history, and demographic information. Household assets and use of water treatment methods was confirmed with observation when possible.

Following administration of the survey, a sample of water was collected directly from the storage vessel the informant identified to be used for drinking. In order to assess how the household sample compared with the water supply (well, tap, etc.) from which it was drawn, samples were also collected from community water sources. Community water sources were identified with the aid of village informants and sampled and coded prior to surveying households. Due to limited analytic capacity, a single source water sample was used for all households that reported collecting water from that source. In places where households reported individual water taps piped from a central source, one sample was taken from a randomly selected household to serve as the source sample of all households using that piped water supply.

Samples were collected in sterilized Whirl-pac® bags containing sodium thiosulfate to neutralize possible residual chlorine to simulate water quality at the time of use. Samples were placed in a cooler for transport and processed within 5 hours of collection. A 100 ml sample was passed through a 0.45 µ membrane filter (Millipore Corporation, Bedford, Massachusetts, USA) and incubated on membrane lauryl sulphate media (Oxoid Limited, Basingstoke, Hampshire, England) at 44°C±0.5°C for 18 hours. The number of yellow colonies were counted and recorded as individual thermotolerant coliforms (TTC), all in accordance with *Standard Methods* [23] and the instructions and material from the Oxfam-Delagua portable water testing kit (<http://www.delagua.org/>). In order to meet WHO guidelines for drinking water quality, 100 ml samples should be free of TTC; samples containing 1–10, 11–100, and 101–1000 cfu/100 ml of TTC are considered low risk, moderate risk, and high risk, respectively [24].

### Data analysis

Data were entered twice into Microsoft Excel 2008 and cross-checked for consistency. Data were cleaned and analyzed in SPSS v.18 (Chicago, IL), SAS v9.2 (Cary, NC) and STATA v.10 (College Station, TX). To assess the equity of adoption of Pureit, we conducted a logistical regression using adoption status as the key dependent variable. Independent covariates included socio-economic status (SES), family size, presence of children under 5 years, education level for male and female heads of household, observed presence of soap, presence of latrine, reported hand-washing practices, water source type, and distance to water source. SES was assessed using a wealth score derived from an index of house assets calculated using principal components analysis [25]. To assess equity of membership in an MFI, adopters and non-adopters were compared to non-members; responses were weighted based on the overall adoption status in the study area of 8.8%.

Differences between adoption status and water quality measures were assessed using colony counts as the dependent variable. Samples that exhibited contiguous growth of bacteria or were otherwise too numerous to count (TNTC) were given the value of 1.5 times the highest number of colonies of the samples that were still countable for statistical and analytical purposes. Tests were performed to compare household and source water quality and to compare water quality to adoption status and water treatment practices. Due to over-dispersion of data and excess 0 values, analysis of water quality samples utilized a negative binomial distribution. To compare changes between source and stored drinking water, colony counts were normalized using a log<sub>10</sub> transformation and the difference between stored and household water samples were calculated. For this purpose, colony counts of zero were assigned values of 1 added in order to allow for log<sub>10</sub> transformation. The resulting distribution approximated normality and estimates of effect were calculated using student's t-test.

Population level estimates were calculated using the SVY command in STATA. Where source water was included in the analysis, standard errors were adjusted to account for clustering at the water source level. Sampling weights were employed at the MFI level based on probability of selection.

## Results

### Study population and adoption

Our analysis covers 281 adopters, 247 non-adopters and 251 other community members (Table 1). Sixteen adopters (5.7%) were eliminated from analysis because no Pureit filter was observed at their house. A total of 53 (10.0%) surveys were discarded due to incomplete records. During the initial 18 months of the program, 3,651 filters were purchased among 41,290 SHG members exposed to the program in the four MFIs included in the study, an adoption rate of 8.8% (Table 1). Ninety-nine (35.0%) of Pureit users had replaced the battery of consumables at least once (range 1–7). At the time of the investigator's visit, however, the end-of-life indicator on 163 (62.9%) of Pureit devices showed the need to replace the consumable components.

### Demographics

Table 2 shows key demographic characteristics and water management practices for adopters, non-adopters and community

**Table 1.** Sample sizes, program delivery information and adoption rates by microfinance organization.

|                           | Total  | PSS    | CAMP  | CAMEL | IWB   |
|---------------------------|--------|--------|-------|-------|-------|
| Adopters sampled          | 281    | 125    | 41    | 80    | 35    |
| Non-Adopters sampled      | 248    | 70     | 52    | 87    | 39    |
| Community members sampled | 251    | 104    | 24    | 88    | 35    |
| Villages sampled          | 33     | 14     | 9     | 5     | 5     |
| Exposed Members           | 41,290 | 29,169 | 3,764 | 5,663 | 2,694 |
| Filters sold              | 3,651  | 2,784  | 261   | 425   | 181   |
| Member Adoption rate      | 8.8%   | 9.5%   | 6.9%  | 7.5%  | 6.7%  |

doi:10.1371/journal.pone.0044068.t001

**Table 2.** Household demographics and water treatment practices among adopters, non-adopters, and community members generally.

| Variable                                     | Adopters     | Non-adopters | $p^1$  | Community Members | $p^2$ |
|----------------------------------------------|--------------|--------------|--------|-------------------|-------|
|                                              | $n = 265$    | $n = 247$    |        | $n = 247$         |       |
| Mean age of respondent                       | 35.4 (9.7)   | 36.4 (9.5)   | 0.30   | 34.8 (9.8)        | 0.04  |
| Mean household size                          | 4.4 (1.4)    | 4.3 (1.5)    | 0.25   | 4.3 (1.7)         | 0.97  |
| Households with children under 5             | 57 (21.5%)   | 32 (13.0%)   | 0.02   | 58 (23.2%)        | <0.01 |
| Education of male household head             |              |              |        |                   |       |
| No formal education                          | 26 (9.9%)    | 57 (23.1%)   | ref    | 39 (15.7%)        | ref   |
| Some/completed primary school                | 28 (10.6%)   | 51 (20.7%)   | 0.80   | 36 (14.5%)        | 0.93  |
| At least some secondary school               | 211 (79.5%)  | 139 (56.2%)  | <0.01  | 175 (69.8%)       | 0.03  |
| Education of female household head           |              |              |        |                   |       |
| No formal education                          | 44 (16.6%)   | 90 (36.6%)   | ref    | 73 (29.1%)        | ref   |
| Some/completed primary school                | 49 (18.5%)   | 60 (24.4%)   | 0.10   | 53 (21.1%)        | 0.80  |
| At least some secondary school               | 172 (64.9%)  | 96 (39.0%)   | <0.001 | 125 (49.8%)       | 0.12  |
| Asset score                                  |              |              |        |                   |       |
| Poorest 40%                                  | 56 (22.0%)   | 126 (52.5%)  | ref    | 111 (46.4%)       | ref   |
| Middle 40%                                   | 125 (49.0%)  | 82 (34.2%)   | <0.001 | 87 (36.4%)        | 0.72  |
| Least poor 20%                               | 74 (29.0%)   | 32 (13.3%)   | <0.001 | 41 (17.2%)        | 0.33  |
| Electricity                                  | 265 (100.0%) | 244 (98.8%)  | 0.11   | 246 (98.4%)       | 0.67  |
| Current water source is improved             | 238 (89.8%)  | 229 (92.7%)  | 0.54   | 208 (82.9%)       | <0.01 |
| Current water source is improved within 1 KM | 101 (44.1%)  | 125 (38.1%)  | 0.08   | 85 (33.9%)        | <0.01 |
| Water treatment                              |              |              |        |                   |       |
| Reported treating current water for drinking | 245 (92.5%)  | 144 (58.3%)  | <0.001 | 165 (65.7%)       | 0.47  |
| Treatment method used currently              | 230 (81.8%)  | 81 (32.8%)   | <0.001 | 116 (46.2%)       | 0.01  |
| Pureit                                       | 209 (77.4%)  | 0 (0.0%)     | <0.001 | 7 (2.8%)          | 0.03  |
| Boiling                                      | 13 (4.6%)    | 21 (8.5%)    | 0.02   | 30 (12.0%)        | 0.06  |
| Ceramic filter                               | 16 (5.7%)    | 60 (24.3%)   | <0.001 | 83 (33.2%)        | 0.07  |
| Treatment methods used previously            | 140 (49.8%)  | 103 (41.7%)  | 0.14   | 143 (57.0%)       | <0.01 |
| Boiling                                      | 35 (12.5%)   | 48 (19.4%)   | 0.03   | 71 (28.3%)        | <0.01 |
| Ceramic filter                               | 114 (40.6%)  | 66 (26.7%)   | 0.03   | 97 (38.7%)        | 0.07  |

Data are mean (SD) or count (%) weighted for probability of selection. "ref" refers to the referent group.  $p^1$  is the probability of the difference between adopters (cases) and non-adopters (controls) being attributable to chance.  $p^2$  is the probability of the difference between MFI members and community members being attributable to chance.

doi:10.1371/journal.pone.0044068.t002

members generally. Adopters were more likely than non-adopters to have children under 5 years old (21.5% vs. 13.0%,  $p < 0.01$ ) and had a greater percentage that had at least some secondary education among male (79.5% vs. 56.2%,  $p = 0.02$ ) and female heads of household (64.9% vs. 39.0%,  $p = 0.05$ ). Adopters were more likely than non-adopters to be in the highest 20% and next 40% wealth quintiles.

Although similar in socio-economic indicators, community members were different from MFI members in important respects (Table 2). Community members were more likely to have a child under 5 (23.2%,  $p < 0.01$ ), but were slightly better educated. Heads of household were more likely to have some secondary education for males (69.8%,  $p = 0.03$ ), but not females (49.8%,  $p = 0.12$ ). The distribution of community members into SES quintiles was similar to that of the MFI members. Community members were more likely than non-adopters to have used microbiologically effective HWT methods, such as boiling, filtration, or Pureit (46.2% vs. 32.8%,  $p < 0.01$ ).

### Water treatment practices

Adopters were more likely to report treating their current drinking water (92.5%) than non-adopters (58.3%,  $p < 0.001$ ) (Table 2). A greater percentage of non-adopters reported boiling their water (19.4%) or using ceramic filters (24.3%) than adopters (12.5%,  $p = 0.02$  and 5.7%,  $p < 0.001$ , respectively). No respondents reported treating their water with chlorine in liquid or tablet form. Adopters were more likely to report relying on ceramic filtration (40.6%) before purchasing Pureit than non-adopters (26.7%) ( $p = 0.03$ ), but less likely to boil (12.5% vs. 19.4%) ( $p = 0.03$ ). Combining these suggests that adopters were more likely to use potentially effective HWT methods prior to their acquisition of Pureit (49.8%) than non-adopters (41.7%), but the difference was not statistically significant ( $p = 0.14$ ). Fewer than 80% of households with Pureit observed in their home reported using Pureit to treat their current water and only 73% were using their unit to store water at the time of the survey.

Approximately half (46.2%) of community members reported treating their water prior to drinking. One third (33.2%) reported using a ceramic water filter, while 12.0% reported boiling. This was higher than members of the MFI ( $p < 0.01$  for both). Only 7 (2.8%) of community members had purchased the Pureit filter.

### Water quality

Water quality samples included 520 households and 33 source water samples. A total of 273 adopters (97%) and 247 non-adopters (98%) had complete data for household and source samples and were used for analysis.

In general, water quality at the source was of poor microbiological quality, with a geometric mean coliform count of 144.6 (95%CI: 78.8–210.4) TTC/100 ml (Table 3). Fewer than 10% of source samples met the WHO Guidelines for safe drinking water by being free of detectible TTC; 70% of source water samples exceeded 100 TTC/100 ml (high risk) and another 15% of source water samples had TTC counts between 11–100/100 ml (moderate risk).

Household samples overall had lower levels of fecal contamination compared to source, with a geometric mean of 24.8 (95%CI: 19.9–30.8) TTC/100 ml (Table 3). Among the overall study population, 39.5% of household samples had contamination levels in excess of 100 TTC/100 ml, and 20.2% were of moderate risk. About one quarter (26.3%) of household samples had no detectible fecal contamination (Figure 1). Pureit users whose device

indicated the need for a replacement battery had higher levels of fecal contamination in their drinking water than those with a functioning battery, though that difference was marginally insignificant ( $p = 0.06$ ) (data not shown).

Among household samples, adopters had better water quality than non-adopters (Table 3). The geometric mean TTC count was 13.7 (95%CI: 9.9–18.8) among adopters, and 44.5 (95%CI: 33.7–58.8) among non-adopters ( $p < 0.01$ ). While 46.2% of non-adopters had contamination in excess of 100 TTC/100 ml, 32.5% of adopters met this high-risk level of contamination. Nearly 40% of adopters had no detectible TTC in their household water, compared to 14.6% among non-adopters, regardless of actual reported treatment practices ( $p < 0.01$ ) (Figure 2).

We further explored water quality by reported and observed current treatment practices (Table 3). The geometric mean TTC count was lower for households using Pureit (9.2; 95%CI: 6.5–13.0) than those that reported boiling (55.0; 95%CI 19.2–157.0;  $p = 0.04$ ) and those that reported no or no safe treatment (64.4; 95%CI 47.7–86.8;  $p < 0.01$ ); however, it was not significantly different than those who used a ceramic filter (15.5; 95%CI: 9.3–25.9) ( $p = 0.79$ ). TTC count was highest for those using unsafe methods such as cloth filtration or no method (64.4; 95%CI: 47.7–86.8). Respondents that treated their current water with Pureit had the highest proportion of their household samples (43.0%) free of fecal contamination compared to respondents who treated with boiling ( $p < 0.01$ ), those who used a ceramic filter ( $p = 0.01$ ), or

**Table 3.** Arithmetic and geometric means of water samples collected from adopters and non-adopters.

|                                                                                             | n   | Arithmetic mean (95% CI) | Geometric mean (95% CI) | p     |
|---------------------------------------------------------------------------------------------|-----|--------------------------|-------------------------|-------|
| <i>Thermotolerant coliform (TTC) counts for household and source water<sup>†</sup></i>      |     |                          |                         |       |
| Household                                                                                   | 490 | 153.2 (134.8; 171.6)     | 24.8 (19.9; 30.8)       | 0.75  |
| Source                                                                                      | 33  | 144.6 (78.8; 210.4)      | 29.9 (13.0; 68.7)       |       |
| <i>Source water quality (TTC) by adoption status<sup>*†</sup></i>                           |     |                          |                         |       |
| Adopter                                                                                     | 243 | 212.1 (188.4; 235.8)     | 65.3 (49.7; 85.8)       | 0.96  |
| Non-adopter                                                                                 | 247 | 213.4 (191.1; 235.7)     | 101.7 (82.4; 125.4)     |       |
| <i>Household water quality (TTC) by adoption status<sup>†</sup></i>                         |     |                          |                         |       |
| Adopter                                                                                     | 243 | 118.4 (95.4; 141.3)      | 13.7 (9.9; 18.8)        | 0.01  |
| Non-adopter                                                                                 | 247 | 187.5 (159.3; 215.7)     | 44.5 (33.7; 58.8)       |       |
| <i>Household water quality (TTC) by water treatment method<sup>†</sup></i>                  |     |                          |                         |       |
| Confirmed Pureit use                                                                        | 186 | 86.6 (64.3; 108.8)       | 9.2 (6.5; 13.0)         | ref   |
| Other filter methods                                                                        | 72  | 93.4 (53.9; 133.1)       | 15.5 (9.3; 25.9)        | 0.79  |
| Reported boiling                                                                            | 24  | 209.7 (130.3; 289.1)     | 55.0 (19.2; 157.0)      | 0.04  |
| Unsafe or no method                                                                         | 208 | 227 (194.7; 259.3)       | 64.4 (47.7; 86.8)       | <0.01 |
| <i>Log reduction in TTC from source to household by adoption status<sup>§*</sup></i>        |     |                          |                         |       |
| Adopter                                                                                     | 243 | 0.64 (0.47; 0.82)        |                         | 0.24  |
| Non-adopter                                                                                 | 247 | 0.36 (0.21; 0.50)        |                         |       |
| <i>Log reduction in TTC from source to household by water treatment method<sup>§*</sup></i> |     |                          |                         |       |
| Confirmed Pureit use                                                                        | 186 | 0.80 (0.61; 1.00)        |                         | ref   |
| Other filter methods                                                                        | 72  | 0.87 (0.58; 1.17)        |                         | 0.59  |
| Reported boiling                                                                            | 24  | 0.18 (−0.29; 0.64)       |                         | 0.04  |
| Unsafe or no method                                                                         | 208 | 0.13 (−0.01; 0.28)       |                         | 0.01  |

p values determined by

<sup>§</sup>T-tests or

<sup>†</sup>negative binomial regression.

"ref" refers to the referent group.

<sup>\*</sup>Variance adjusted for clustering at source water sample.

doi:10.1371/journal.pone.0044068.t003

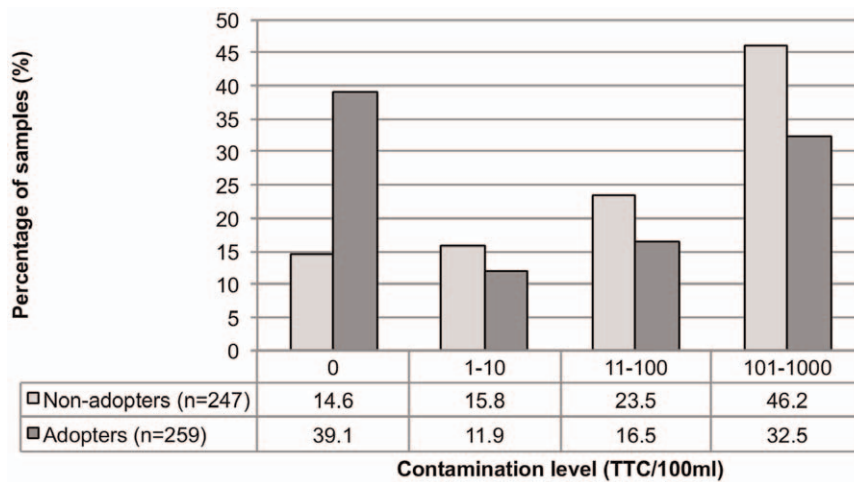

**Figure 1. Household water quality among Pureit adopters and non-adopters.**

doi:10.1371/journal.pone.0044068.g001

those that used unsafe methods or used no method ( $p < 0.001$ ) (Figure 2). Pureit users had similar percentage of samples with TTC counts in excess of 100/100 ml (25.3%) compared to those that used ceramic filters (23.6%) ( $p = 0.78$ ); these values were different than boilers ( $p < 0.001$ ) and those that reported no safe method ( $p < 0.001$ ).

Table 3 also compares the  $\log_{10}$  difference between source and household water quality by reported treatment method. Adopters and non-adopters had no difference in the change in water quality from source to home. There was a difference between Pureit users and boilers ( $p = 0.04$ ) and those who used no or no safe method ( $p = 0.01$ ). However, there was no significant difference between

Pureit users and those who reported using ceramic filters ( $p = 0.59$ ).

#### Equity and water quality

We assessed the water quality for sampled source and household water by a number of key equity variables independent of intervention status. While source water quality was similar between SES quintiles, household water quality varied (Figure 3). The poorest households had a smaller proportion of samples with no detectable TTC/100 ml as compared to the least poor (18.3% vs. 32.4%,  $p = 0.007$ ), and a greater proportion of samples with more than 100 TTC/100 ml in their household water (45.1% vs.

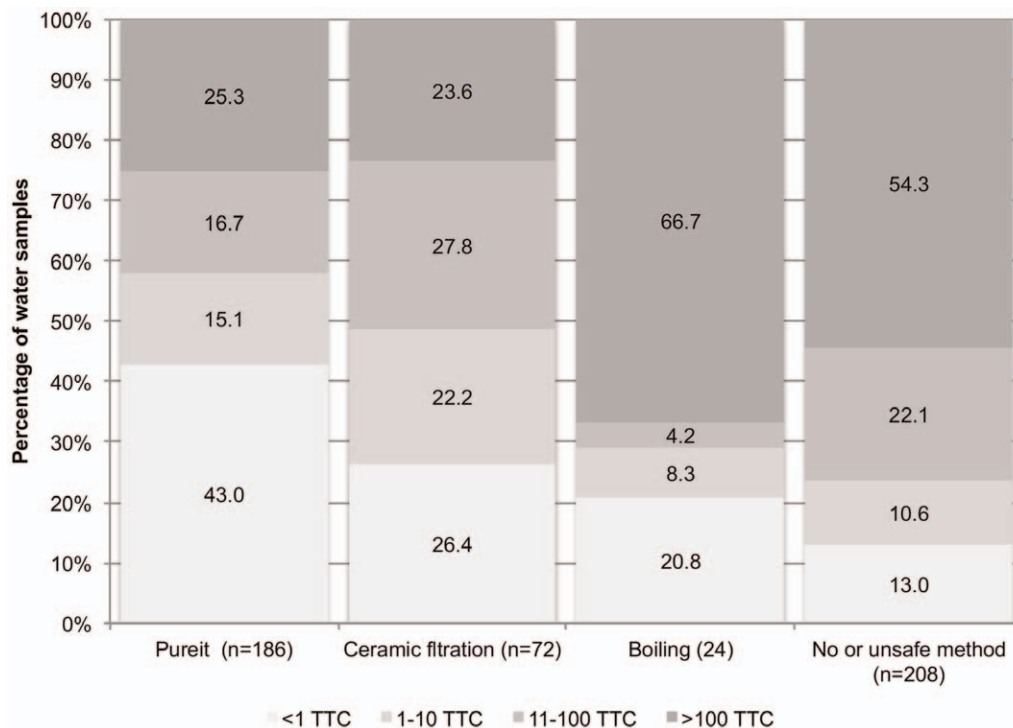

**Figure 2. Household water quality of respondents using Pureit, other safe treatment methods or no or unsafe treatment methods.**

doi:10.1371/journal.pone.0044068.g002

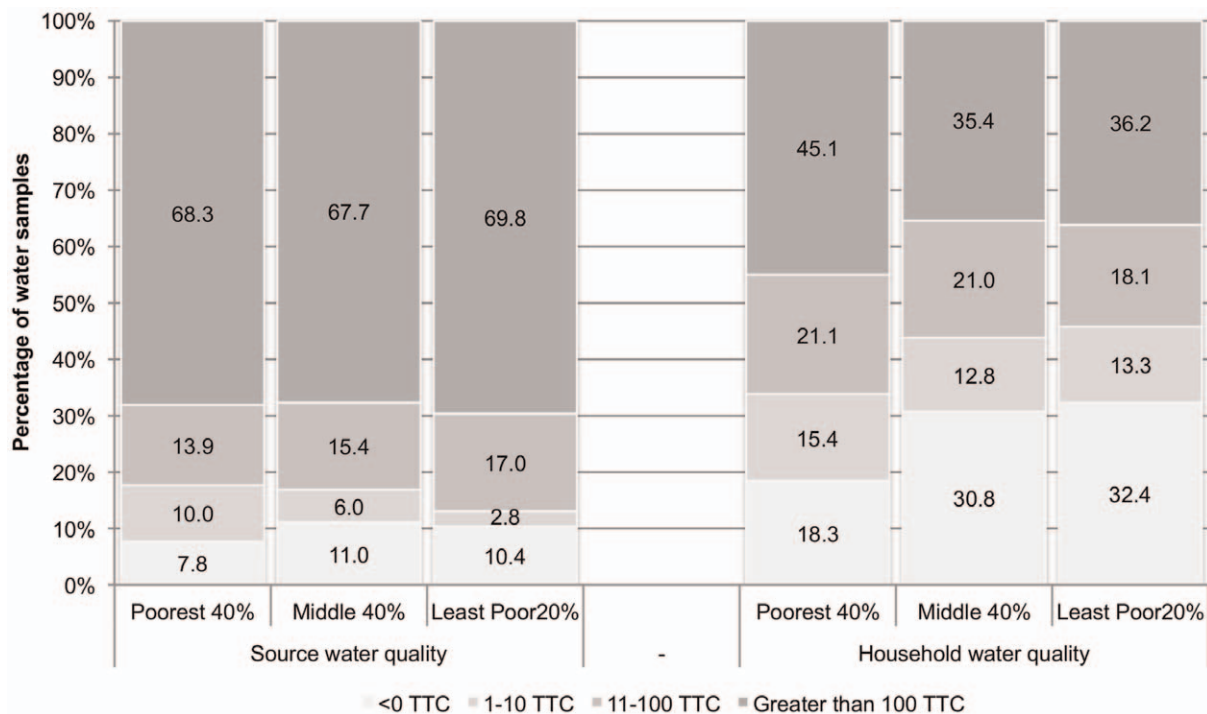

**Figure 3. Source and household water quality by wealth tercile.**  
doi:10.1371/journal.pone.0044068.g003

36.2%,  $p = 0.14$ ), though the difference was not statistically significant.

A significance test of the log reduction of contamination between source and household water quality, regardless of adoption status, revealed that the difference between the least poor and poorest socio-economic tercile was significant at  $p < 0.1$  (data not shown). When regressed against the linear combination of wealth and Pureit adoption, we found that wealth tercile was a significant effect modifier in the improvement between source and household water quality ( $p = 0.04$  if tercile 2 vs. 1, though  $p = 0.63$  for tercile 3 vs. 1). Given positive indication for effect modification, we present separate estimates of effect for each SES tercile (Table 4). These data suggests that poorer households were less likely to achieve improvement in water quality from using Pureit than adopters from higher economic strata. Adopters in the poorest 40% of the population showed no significant improvement in water quality ( $\beta -0.11$ ,  $p = 0.66$ ). However, those in the middle 40% had a 0.56 log improvement in water quality ( $p = 0.05$ ); among the least poor 20%, adopters had a commensurate improvement in water quality ( $\beta 0.49$ ,  $p = 0.12$ ).

## Discussion

Overall, the pilot program resulted in increased water quality among households that had adopted a Pureit water filter; however, the program had only limited success in achieving its aim of providing safe drinking water to a vulnerable population. This was in part due to the tendency of adopters to come from potentially lower risk strata; they had better socioeconomic indicators and were more likely to have previously used effective HWTS products, in this case boiling and ceramic water filters. In addition, there were sub-optimal improvements in water quality even among adopters, likely due to lack of correct and consistent use of the device.

During the initial 18-month period of the pilot program, 9.8% of SHG participants exposed to the program acquired Pureit filters. On the one hand, this is an impressive level of market penetration for a consumer durable in a low-income, rural population sold through commercial channels, particularly during the early stage of a product's life cycle. Even socially marketed health products rarely achieve this level of penetration [15]. Moreover, any level of sales where the cost is borne by the beneficiary reduces the outlay that the public sector or civil society must make in order to achieve higher levels of coverage. Additional efforts are underway in India promote water filters to SHG members using microfinance [26]. It is possible that these efforts will benefit from additional experience and achieve higher levels of penetration in the target population. Ultimately, however, the potential contribution of HWTS will depend on the extent to which it achieves scale. The relatively low levels of uptake when promotion is conducted through commercial channels has led promoters of other household-based health products, such as insecticide treated mosquito nets for preventing malaria, to abandon a commercial strategy in favor of free distribution [15].

These results provide some evidence that the program was not optimizing improved access to safe drinking water for segments of the population that may be most vulnerable. Half of current Pureit users reported a history of boiling or using ceramic filters, a higher percentage of safe water practice than among non-adopters. This indicates that a disproportionate number of households were simply substituting the new HWTS technology for another water treatment method shown to reduce pathogen contamination. Pureit users did have better water quality than those boiling, and Pureit has been shown to be capable of significantly higher levels of microbiological performance than ceramic filters, particularly in respect of viruses [11]. However, we did not observe a statistically significant difference in the log reduction value achieved by Pureit compared to ceramic filters in this study. Although adopters were

**Table 4.** The log improvement of water quality (TTC/100 ml) between household and source water modeled against adopters status and Pureit use, for each socio-economic tercile.

| Variable            | Pureit adopters vs. non adopters |             |                | Pureit use vs. non use |             |                |
|---------------------|----------------------------------|-------------|----------------|------------------------|-------------|----------------|
|                     | $\beta$                          | CI          | <i>p</i> value | $\beta$                | CI          | <i>p</i> value |
| Model 1: unadjusted | 0.49                             | 0.6; 0.92   | 0.03           | 0.28                   | 0.25; 0.82  | 0.29           |
| Model 2: SES        |                                  |             |                |                        |             |                |
| Poorest 40%         | −0.11                            | −0.62; 0.40 | 0.66           | 0.11                   | −0.40; 0.61 | 0.64           |
| Middle 40%          | 0.56                             | 0.004; 1.12 | 0.05           | 0.62                   | −0.04; 1.27 | 0.06           |
| Least poor 20%      | 0.49                             | −.13; 1.11  | 0.12           | 0.41                   | −0.26; 1.08 | 0.22           |

$\beta$  are log improvements in water quality between the source and household point-of-use calculated using linear regression of log-transformed values.

doi:10.1371/journal.pone.0044068.t004

more likely to have children <5, who are at greatest risk of mortality from unsafe drinking water [27], non-adopters were more likely to fall into vulnerable demographic categories, including lower education, less wealth, and poorer access to an improved water source within 1 KM. In addition, Pureit adopters in the poorest economic quintile did not achieve the same improvement in water quality as those in higher quintiles. Promotion through SHGs may need to include greater targeting of the most vulnerable households so that the program moves beyond increasing the number of products available on the market to enabling health behavior change.

Despite starting with comparable source water quality, Pureit adopters had better drinking water quality at the household level on average than non-adopters, even though non-adopters included households that reported boiling their water or using ceramic filters. However, a substantial proportion of adopters continued to be exposed to high levels of fecal contamination in the water they reported drinking. These results are comparable to the improvement in water quality in a study of self-reported boilers in India [13]. They demonstrate that possessing the hardware for effectively treating water at home is not sufficient for ensuring safe drinking water at the household level.

One possible explanation for the sub-optimal household water quality among adopters of Pureit is the apparent low rates of compliance (correct, consistent use). Consistent use in areas with high pathogen contamination has been shown to be more critical than slight differences in pathogen reduction [28]. Only 73% of households observed to have a Pureit were using their unit to store water at the time of the survey, and fewer than 80% of adopter households reported using Pureit to treat the water they were actually drinking. Over two-thirds of Pureit users required a replacement battery and yet many were continuing to use the filter. There was some evidence that water quality was poorer among those whose battery needed replacement [29]. HUL reports that it has since modified the Pureit to block the water flow and thus render it unusable when the disinfection agent has been exhausted. However, the apparent issues concerning sustained use of the filter may arise chiefly from limited awareness of need, access and affordability of the consumables, a challenge that is not addressed with this hardware fix. Consistent and sustained use of household water treatment methods is a frequently discussed challenge and indicates that any future promotional programs should have a greater focus on behavior change [15,30].

This study offers mixed evidence on the merits of enlisting MFIs and SHGs in drinking water initiatives. There were no significant differences between the SES profile of SHG members and community members, and rates of using effective water treatment

methods – filters or boiling – were similar if not higher among non-SHG community members. However, community members were more likely to have children under 5 and less likely to have access to an improved water source. While focusing on SHG members may miss some vulnerable households, there are indications that such programs do reach a relatively equitable cross-section of the population.

There were a number of key limitations to this study. First, it was challenging to develop a comprehensive sampling framework. Not all microfinance organizations keep diligent records of members who purchased Pureit or even membership records. We constructed the most comprehensive list of adopters and non-adopters with the available information. However, sampling bias may impact our findings. Second, our water sampling methods were limited by available resources and the inability to run a suitable number of dilutions. Of the 506 household water samples collected, 60 (11.9%) had coliform counts that were too numerous to count (TNTC) and 5 of 33 (15.2%) of source water samples were found to be TNTC. We followed standard protocols for working with lab results truncated by detection limits, but the potential for bias remains. Third, the clustered nature of the data and the analytical requirements of using these type of data limited our power to reject the null hypothesis regarding the equity of water quality measures.

When assessing the success of a program to improve water quality to improve health, it is common to rely on the number of units in use or calculate the percentage uptake of a particular product as evidence of delivery of safe water. The implication is that adoption of a particular method confers benefits of the water treatment technology revealed from effectiveness trial data. However, our findings point to the need for better monitoring approaches to ensure that the technology is meeting those in greatest need. Indicators to consider include previous water handling practices, socio-economic indicators and water quality improvements in order to fully understand who is benefitting from a distribution program. The challenge of sustained correct use of the product echoes similar challenges of HWTs discussed elsewhere [12,15].

## Acknowledgments

The authors would like to thank people who were instrumental in this research, including Shailesh Gupta, Rama Krishna, Ratna Prasad, Vinod and all of the supportive staff at HUL, as well as Vipin, Madhavi and Shailendar at ACCESS. Thanks to Sarath, Bhavani and the rest of the survey team for their help with problem solving and negotiating life in the field. The formative work of Mari Watanabe was invaluable to the study design, and Dr. Manuela Orjuela provided essential support from Columbia. We are particularly grateful to Satyanand of PSS, Prasad

Naidu of IWB, Eschwaramma of CAMEL and all of the people working to provide economic empowerment to women through microfinance. Finally, thanks to the women who offered their time to participate in this research.

## References

1. Pruss-Ustun A, Bonjour S, Corvalan C (2008) The impact of the environment on health by country: a meta-synthesis. *Environ Health* 7: 7.
2. Boschi-Pinto C, Velebit L, Shibuya K (2008) Estimating child mortality due to diarrhoea in developing countries. *Bull World Health Organ* 86: 710–717.
3. Blakely T, Hales S, Kieft C, Wilson N, Woodward A (2005) The global distribution of risk factors by poverty level. *Bull World Health Organ* 83: 118–126.
4. UNICEF/WHO (2009) Diarrhoea: Why children are still dying and what can be done. Geneva: WHO.
5. WHO UNICEF (2010) Progress on Sanitation and Drinking-water: 2010 Update. Geneva: WHO.
6. WHO/UNICEF Joint Monitoring Program for Water Supply and Sanitation (2012) Estimates for the use of improved drinking-water sources - India. Geneva: UNICEF/WHO.
7. National Environmental Engineering Research Institute (2004) Potable water quality assessment in some major cities in India. Nagpur, India: NEERI, JIPHE. 65 p.
8. Properzi F (2010) Rapid Assessment of Drinking Water Quality. Stockholm World Water Conference. Stockholm, Sweden.
9. Wright J, Gundry S, Conroy R (2004) Household drinking water in developing countries: a systematic review of microbiological contamination between source and point-of-use. *Trop Med Int Health* 9: 106–117.
10. Fewtrell L, Kaufmann RB, Kay D, Enanoria W, Haller L, et al. (2005) Water, sanitation, and hygiene interventions to reduce diarrhoea in less developed countries: A systematic review and meta-analysis. *The Lancet Infectious Diseases* 5: 42–52.
11. Clasen T, Schmidt WP, Rabie T, Roberts I, Cairncross S (2007) Interventions to improve water quality for preventing diarrhoea: systematic review and meta-analysis. *BMJ* 334: 782.
12. Hunter P (2009) Household Water Treatment in Developing Countries: Comparing Different Intervention Types Using Meta-Regression. *Environmental Science & Technology* 43: 8991–8997.
13. Clasen T, McLaughlin C, Nayaar N, Boisson S, Gupta R, et al. (2008) Microbiological effectiveness and cost of disinfecting water by boiling in semi-urban India. *Am J Trop Med Hyg* 79: 407–413.
14. Clasen TF, Thao do H, Boisson S, Shipin O (2008) Microbiological effectiveness and cost of boiling to disinfect drinking water in rural Vietnam. *Environ Sci Technol* 42: 4255–4260.
15. Clasen T (2009) Scaling Up Household Water Treatment Among Low-Income Populations. Geneva: World Health Organization.
16. International Institute for Population Sciences (IIPS) and Macro International (2007) National Family Health Survey (NFHS-3), 2005–6: India, Volume I. Mumbai: IIPS.
17. Freeman M, Clasen T (2010) A cluster-randomized trial to assess the impact of a school-based safe water intervention on household adoption of point-of-use water treatment practices in Southern India. *Am J Trop Med & Hygiene* 84: 370–378.
18. Trinies V, Freeman M, Hennink M, Clasen T (2012) The role of social networks on the adoption of household water filters by members of women's self-help groups in rural India. *Journal of Water, Sanitation and Hygiene for Development* 1: 224–232.
19. Freeman M, Quick R, Abbott D, Ogutu P, Rheingans R (2009) Removing barriers to point-of-use water treatment products through social marketing and entrepreneurship: A case study in Western Kenya. *J Water Health* 7: 527–534.
20. ICMR (2006) Ethical Guidelines for Biomedical Research on Human Participants. New Delhi: Indian Council for Medical Research.
21. Clasen T, Nadakatti S, Menon S (2006) Microbiological performance of a water treatment unit designed for household use in developing countries. *Trop Med & Int'l Health* 11: 1399–1405.
22. Khan A (2008) A study protocol to evaluate the socioeconomic disparities and determinants of household water treatment adoption in southern India. London: London School of Hygiene and Tropical Medicine.
23. APHA (2005) Standard Methods for the Examination of Water and Wastewater. Washington, DC: American Public Health Association (APHA), the American Water Works Association (AWWA), and the Water Environment Federation (WEF).
24. WHO (1993) Guidelines for Drinking-Water Quality. Geneva: World Health Organization.
25. Vyas S, Kumaranayake L (2006) Constructing socio-economic status indices: how to use principal components analysis. *Health Policy Plan* 21: 459–468.
26. PATH. (2011) The Private Sector and HWTS/POU. Chapel Hill, NC: The Water Institute.
27. Kosek M, Bern C, Guerrant RL (2003) The global burden of diarrhoeal disease, as estimated from studies published between 1992 and 2000. *Bulletin of the World Health Organization* 81: 197–204.
28. Brown J, Clasen T (2012) High adherence is necessary to realize health gains from water quality interventions. *PLoS ONE* 7: e36735.
29. Brown J, Clasen T (2012) High adherence is necessary to realize health gains from water quality interventions. *PLoS ONE* 7: e36735.
30. Hunter P, Zmirou-Navier D, Hartemann P (2009) Estimating the impact on health of poor reliability of drinking water interventions in developing countries. *Science Total Environment* 407: 2621–2624.

## Author Contributions

Conceived and designed the experiments: MCF TC. Performed the experiments: VT GM. Analyzed the data: MCF SB. Contributed reagents/materials/analysis tools: MCF. Wrote the paper: MCF VT TC.
